# Supplementary material for: Bite the Stress Away? Nail Biting and Smoking Predict Maladaptive Stress Coping Strategies
Source: Atypon-hosted journal article supplement (doi:10.1027/1614-0001/a000303), 2019-09-10
Supplement: 1614-0001_a000303_esm1.pdf [file 1614-0001_a000303_esm1.pdf]

## Supplementary Table S1

*Inter-scale correlations and sex differences for all variables included in the hierarchical regression models*

|                                             | (1)       | (2)     | (3)     | (4)     | (5)     | (6)     | (7)     | (8)     | (9)    | (10)   | (11)  |
|---------------------------------------------|-----------|---------|---------|---------|---------|---------|---------|---------|--------|--------|-------|
| (1) Non-smokers (0) vs. smokers (1)         |           |         |         |         |         |         |         |         |        |        |       |
| (2) Non-nail biters (0) vs. nail biters (1) | .01       |         |         |         |         |         |         |         |        |        |       |
| (3) Openness                                | .04       | .01     |         |         |         |         |         |         |        |        |       |
| (4) Conscientiousness                       | -.15***   | -.11**  | -.07    |         |         |         |         |         |        |        |       |
| (5) Extraversion                            | .08*      | -.02    | .23***  | -.06    |         |         |         |         |        |        |       |
| (6) Agreeableness                           | -.06      | .02     | .26***  | .13***  | .27***  |         |         |         |        |        |       |
| (7) Neuroticism                             | -.03      | .12***  | -.06    | -.17*** | -.18*** | -.06    |         |         |        |        |       |
| (8) Task-oriented coping                    | -.07*     | -.09*   | .18***  | .30***  | .10**   | .20***  | -.29*** |         |        |        |       |
| (9) Emotion-oriented coping                 | -.05      | .10**   | -.14*** | -.24*** | -.18*** | -.03    | .54***  | -.33*** |        |        |       |
| (10) Avoidance-oriented coping              | .12***    | .05     | -.10**  | -.09*   | .17***  | .08*    | .10**   | -.07    | .19*** |        |       |
| (11) Age                                    | .01       | -.21*** | -.21*** | .21***  | -.23*** | -.14*** | -.01    | .17***  | -.09** | -.09** |       |
| Women                                       | <i>M</i>  |         | 3.60    | 3.69    | 3.37    | 4.16    | 2.84    | 3.73    | 2.75   | 2.99   | 31.50 |
|                                             | <i>SD</i> |         | 0.73    | 0.79    | 0.81    | 0.68    | 0.76    | 0.58    | 0.77   | 0.88   | 13.36 |
| Men                                         | <i>M</i>  |         | 3.87    | 3.62    | 3.39    | 3.88    | 2.52    | 3.92    | 2.40   | 2.57   | 32.57 |
|                                             | <i>SD</i> |         | 0.71    | 0.79    | 0.80    | 0.68    | 0.77    | 0.56    | 0.66   | 0.82   | 13.60 |
| Difference                                  | <i>t</i>  |         | 5.42    | -1.11   | 0.35    | -6.10   | -6.17   | 4.82    | -7.02  | -7.07  | 1.15  |
|                                             | <i>df</i> |         | 830     | 827     | 826     | 832     | 829     | 824     | 820    | 824    | 834   |
|                                             | <i>p</i>  |         | <.001   | .267    | .726    | <.001   | <.001   | <.001   | <.001  | <.001  | .250  |
|                                             | <i>d</i>  |         | 0.38    | -0.08   | 0.02    | -0.42   | -0.43   | 0.34    | -0.49  | -0.49  | -0.08 |

Note. *M* = mean; *SD* = standard deviation; pairwise exclusion of missing cases, number of participants for calculation of inter-scale correlations ranged from 813 to 836.

\*  $p < .05$ ; \*\*  $p < .01$ ; \*\*\*  $p < .001$
