# Supplementary material for: Bite the Stress Away? Nail Biting and Smoking Predict Maladaptive Stress Coping Strategies
Source: Atypon-hosted journal article supplement (doi:10.1027/1614-0001/a000303), 2019-09-10
Supplement: 1614-0001_a000303_esm2.pdf [file 1614-0001_a000303_esm2.pdf]

Table S2.

*Items and standardized factor loadings for the CISS-SF Subscales (German version).*

| Item                                       | Task-oriented | Emotion-oriented | Treat oneself | Contact a friend |
|--------------------------------------------|---------------|------------------|---------------|------------------|
| 2. Focus on the problem                    | 0.62 (0.03)   |                  |               |                  |
| 6. Consider similar problems               | 0.47 (0.03)   |                  |               |                  |
| 8. Determine course of action              | 0.61 (0.03)   |                  |               |                  |
| 11. Work to understand the situation       | 0.55 (0.03)   |                  |               |                  |
| 13. Take corrective action immediately     | 0.44 (0.03)   |                  |               |                  |
| 16. Think about and learn from mistakes    | 0.59 (0.03)   |                  |               |                  |
| 19. Analyze the problem                    | 0.55 (0.03)   |                  |               |                  |
| 3. Blame myself for the situation          |               | 0.47 (0.03)      |               |                  |
| 5. Worry about being unable to cope        |               | 0.68 (0.02)      |               |                  |
| 10. Blame myself for being too emotional   |               | 0.49 (0.03)      |               |                  |
| 12. Become very upset                      |               | 0.52 (0.03)      |               |                  |
| 14. Blame myself for not having a solution |               | 0.72 (0.02)      |               |                  |
| 17. Wish I could change things.            |               | 0.58 (0.03)      |               |                  |
| 20. Focus on my inadequacies               |               | 0.48 (0.03)      |               |                  |
| 4. Treat myself to a snack                 |               |                  | 0.61 (0.03)   |                  |
| 9. Buy myself something                    |               |                  | 0.63 (0.03)   |                  |
| 18. Go out for a meal                      |               |                  | 0.74 (0.03)   |                  |
| 7. Visit a friend                          |               |                  |               | 0.86 (0.02)      |
| 15. Spend time with a special person       |               |                  |               | 0.74 (0.02)      |
| 21. Phone a friend                         |               |                  |               | 0.82 (0.02)      |

*Note.* Confirmatory factor analysis using maximum-likelihood estimation. All factor loadings  $p < .001$ , standard errors in parentheses.  $N = 807$ .

$\chi^2 (165) = 486.804, p < .001, CFI = 0.919, TLI = 0.907, RMSEA = 0.049, SRMR = 0.051$

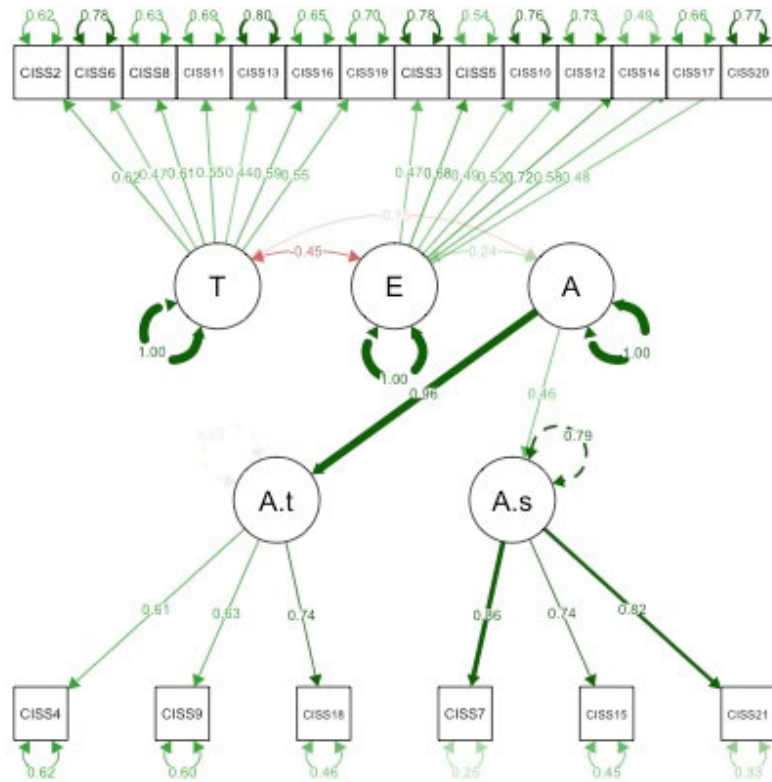

Figure S3. Full model specification for the confirmatory factor analysis of the German version of the CISS-SF. Plotted using package *semPlot* in R (Epskamp & Stuber, 2017)

Epskamp & Stuber (2017). *semPlot: Path Diagrams and Visual Analysis of Various SEM Packages*. Retrieved from: <https://CRAN.R-project.org/package=semPlot>
