# Supplementary material for: Bite the Stress Away? Nail Biting and Smoking Predict Maladaptive Stress Coping Strategies
Source: Atypon-hosted journal article supplement (doi:10.1027/1614-0001/a000303), 2019-09-10
Supplement: 1614-0001_a000303_esm3.csv [file 1614-0001_a000303_esm3.csv]

	CISS2	CISS6	CISS8	CISS11	CISS13	CISS16	CISS19	CISS3	CISS5	CISS10	CISS12	CISS14	CISS17	CISS20	CISS4	CISS9	CISS18	CISS7	CISS15	CISS21
CISS2	0.670649782187765	0.237500556622736	0.283057632334176	0.218785748615353	0.199002224955432	0.256754328989373	0.27604802464188	-0.10757022275658	-0.195739264091001	-0.0697736196140032	-0.207889762594645	-0.242300563993188	-0.153276243034538	-0.128675821383219	-0.0641229391523058	-0.120500760845698	-0.117514191960372	-0.0373635890419793	-0.0856615518795422	-0.0813943668243636
CISS6	0.237500556622736	1.02538967430276	0.268952428333863	0.225703225647947	0.190853268104826	0.274558578976705	0.283719437573033	-0.0541282980856784	-0.00654281234980783	-0.0567033500243379	-0.167432118897687	-0.101360616292693	-0.0551693745403064	0.0247892895037075	-0.0106779434594141	-0.05131831296478	0.00333666539219254	0.0562595873467752	0.0665997183872835	-0.0155547263796182
CISS8	0.283057632334176	0.268952428333863	0.833791683365349	0.201088984397673	0.208007996941262	0.28326031978552	0.34417711198021	-0.127992518990432	-0.300447294352851	-0.144129204037166	-0.241382328418163	-0.258440320061912	-0.153250139347623	-0.152296587019711	-0.0508469110893069	-0.0484146616731849	-0.050796239226471	-0.011364316874191	-0.0327800887218253	-0.0740730504000774
CISS11	0.218785748615353	0.225703225647947	0.201088984397673	0.592698031014251	0.160924623300765	0.2618399414049	0.255691755380814	-0.0129197895121528	-0.100268867975229	-0.0553459583047344	-0.163344588628927	-0.12059596252739	-0.0658949188405663	-0.0462234874832821	-0.0685958826808179	-0.0790005051831174	-0.0944907401009445	0.0638281210412607	0.0576154435553836	-0.00159539592383251
CISS13	0.199002224955432	0.190853268104826	0.208007996941262	0.160924623300765	0.811680325036967	0.188347314160943	0.224881727265608	-0.0565313727928949	-0.293505249144337	-0.173643260872569	-0.224904759930533	-0.254833404734595	-0.21833584389381	-0.0980500545874159	-0.0201535818097225	-0.0501190788776643	0.0258196173813703	-0.0225996508247997	-0.0272891014036106	-0.0816692232924734
CISS16	0.256754328989373	0.274558578976705	0.28326031978552	0.2618399414049	0.188347314160943	0.78226300539425	0.286337483819553	-0.114246624562955	-0.16093844289972	-0.0544998917464748	-0.17799643454347	-0.180801813131383	-0.0605068107590184	-0.0511371226673669	-0.00827333324120267	-0.03798086446198	-0.0599816659987194	0.0635931878590217	0.166936148846294	0.0468945057881087
CISS19	0.27604802464188	0.283719437573033	0.34417711198021	0.255691755380814	0.224881727265608	0.286337483819553	1.10996561990882	-0.129182540011578	-0.180287416948049	-0.220649858963315	-0.301574359423201	-0.137945701260194	-0.153316166320409	-0.027020386979481	-0.143396765292538	-0.132273523644566	-0.0818611621668517	-0.0573006638014031	-0.0746227633362969	-0.126632056248839
CISS3	-0.10757022275658	-0.0541282980856784	-0.127992518990432	-0.0129197895121528	-0.0565313727928949	-0.114246624562955	-0.129182540011578	1.22605946419879	0.422330015094073	0.331397053968605	0.24816007395021	0.388088119904983	0.411265122863912	0.282487957755022	0.168539222325101	0.0975095547171665	0.0768246861031648	0.0339409350340653	-0.00105182503159314	0.0899533051106412
CISS5	-0.195739264091001	-0.00654281234980783	-0.300447294352851	-0.100268867975229	-0.293505249144337	-0.16093844289972	-0.180287416948049	0.422330015094073	1.38125356046612	0.401024800038081	0.442509700590711	0.674268981603043	0.569808168611391	0.33808881088493	0.073990132806346	0.0558296442681678	0.0124714203016051	-0.0348806677630215	0.0323040803133671	0.148202914706971
CISS10	-0.0697736196140032	-0.0567033500243379	-0.144129204037166	-0.0553459583047344	-0.173643260872569	-0.0544998917464748	-0.220649858963315	0.331397053968605	0.401024800038081	1.44359837788618	0.564011614605166	0.391473921649016	0.399403300427333	0.336181706229107	0.202378813633495	0.191528892942638	0.185234833374024	0.181151909638249	0.130662772610783	0.23197271704064
CISS12	-0.207889762594645	-0.167432118897687	-0.241382328418163	-0.163344588628927	-0.224904759930533	-0.17799643454347	-0.301574359423201	0.24816007395021	0.442509700590711	0.564011614605166	1.28767644940722	0.404940353075398	0.37866315341751	0.233540473766562	0.123095774427293	0.160460898980267	0.140069312966316	0.137348387483129	0.10261205775364	0.224797274160882
CISS14	-0.242300563993188	-0.101360616292693	-0.258440320061912	-0.12059596252739	-0.254833404734595	-0.180801813131383	-0.137945701260194	0.388088119904983	0.674268981603043	0.391473921649016	0.404940353075398	1.15811310266887	0.49639692345017	0.410772223834509	0.175462841401676	0.138561441169199	0.167809854602464	0.0395885444737727	0.0721490551233092	0.130123808251529
CISS17	-0.153276243034538	-0.0551693745403064	-0.153250139347623	-0.0658949188405663	-0.21833584389381	-0.0605068107590184	-0.153316166320409	0.411265122863912	0.569808168611391	0.399403300427333	0.37866315341751	0.49639692345017	1.37347773278731	0.388452036010804	0.131525729789988	0.141082750223033	0.00643225555816592	0.0569321411625968	0.120643563368235	0.079791293345556
CISS20	-0.128675821383219	0.0247892895037075	-0.152296587019711	-0.0462234874832821	-0.0980500545874159	-0.0511371226673669	-0.027020386979481	0.282487957755022	0.33808881088493	0.336181706229107	0.233540473766562	0.410772223834509	0.388452036010804	1.09322547904104	0.262696756540125	0.281967419527707	0.196476309368613	0.0878189448275544	0.141339180559202	0.0904891984479055
CISS4	-0.0641229391523058	-0.0106779434594141	-0.0508469110893069	-0.0685958826808179	-0.0201535818097225	-0.00827333324120267	-0.143396765292538	0.168539222325101	0.073990132806346	0.202378813633495	0.123095774427293	0.175462841401676	0.131525729789988	0.262696756540125	2.09165158027114	0.698649825182073	0.779715592653501	0.448201839849274	0.436109690763441	0.335705697820649
CISS9	-0.120500760845698	-0.05131831296478	-0.0484146616731849	-0.0790005051831174	-0.0501190788776643	-0.03798086446198	-0.132273523644566	0.0975095547171665	0.0558296442681678	0.191528892942638	0.160460898980267	0.138561441169199	0.141082750223033	0.281967419527707	0.698649825182073	1.6397353393249	0.69645865099217	0.418047474928944	0.410693912773762	0.351834705312407
CISS18	-0.117514191960372	0.00333666539219254	-0.050796239226471	-0.0944907401009445	0.0258196173813703	-0.0599816659987194	-0.0818611621668517	0.0768246861031648	0.0124714203016051	0.185234833374024	0.140069312966316	0.167809854602464	0.00643225555816592	0.196476309368613	0.779715592653501	0.69645865099217	1.3798071091088	0.433787998138961	0.349734126271211	0.402061269959724
CISS7	-0.0373635890419793	0.0562595873467752	-0.011364316874191	0.0638281210412607	-0.0225996508247997	0.0635931878590217	-0.0573006638014031	0.0339409350340653	-0.0348806677630215	0.181151909638249	0.137348387483129	0.0395885444737727	0.0569321411625968	0.0878189448275544	0.448201839849274	0.418047474928944	0.433787998138961	1.71804332904926	1.00857275788523	1.22553585494949
CISS15	-0.0856615518795422	0.0665997183872835	-0.0327800887218253	0.0576154435553836	-0.0272891014036106	0.166936148846294	-0.0746227633362969	-0.00105182503159314	0.0323040803133671	0.130662772610783	0.10261205775364	0.0721490551233092	0.120643563368235	0.141339180559202	0.436109690763441	0.410693912773762	0.349734126271211	1.00857275788523	1.47414890464323	0.964968852159466
CISS21	-0.0813943668243636	-0.0155547263796182	-0.0740730504000774	-0.00159539592383251	-0.0816692232924734	0.0468945057881087	-0.126632056248839	0.0899533051106412	0.148202914706971	0.23197271704064	0.224797274160882	0.130123808251529	0.079791293345556	0.0904891984479055	0.335705697820649	0.351834705312407	0.402061269959724	1.22553585494949	0.964968852159466	1.72643950317006
