# Supplementary material for: Bite the Stress Away? Nail Biting and Smoking Predict Maladaptive Stress Coping Strategies
Source: Atypon-hosted journal article supplement (doi:10.1027/1614-0001/a000303), 2019-09-10
Supplement: 1614-0001_a000303_esm4.pdf [file 1614-0001_a000303_esm4.pdf]

## Supplementary Table S5

Results of hierarchical multiple regressions predicting coping strategies from smoking status, nail-biting, the Big Five personality traits, sex, age, and education.

| Block             | Predictor                                                        | Task-oriented (n = 789)     |      |         |       |            | Emotion-oriented (n = 786)  |      |         |      |            | Avoidance-oriented (n = 790) |      |         |       |            |
|-------------------|------------------------------------------------------------------|-----------------------------|------|---------|-------|------------|-----------------------------|------|---------|------|------------|------------------------------|------|---------|-------|------------|
|                   |                                                                  | b                           | SE   | $\beta$ | p     | $\eta_p^2$ | b                           | SE   | $\beta$ | p    | $\eta_p^2$ | b                            | SE   | $\beta$ | p     | $\eta_p^2$ |
| 1                 | <i>F(df)</i>                                                     | <i>F(2,786) = 5.46**</i>    |      |         |       |            | <i>F(2,783) = 4.87**</i>    |      |         |      |            | <i>F(2,787) = 7.79***</i>    |      |         |       |            |
|                   | Adj. <i>R</i> <sup>2</sup>                                       | .01                         |      |         |       |            | .01                         |      |         |      |            | .02                          |      |         |       |            |
|                   | Non-smokers (0) vs. smokers (1)                                  | -0.09                       | 0.04 | -.08    | .029  | .006       | -0.06                       | 0.06 | -.04    | .245 | .002       | 0.23                         | 0.07 | .12     | <.001 | .015       |
|                   | Non-nail biters (0) vs. nail biters(1)                           | -0.13                       | 0.05 | -.09    | .015  | .007       | 0.20                        | 0.07 | .10     | .004 | .011       | 0.14                         | 0.08 | .06     | .079  | .004       |
| 2                 | <i>F(df)</i>                                                     | <i>F(3,785) = 3.67*</i>     |      |         |       |            | <i>F(3,782) = 5.49***</i>   |      |         |      |            | <i>F(3,786) = 5.28**</i>     |      |         |       |            |
|                   | $\Delta F$                                                       | <i>F(1, 785) = 0.09</i>     |      |         |       |            | <i>F(1, 782) = 6.66*</i>    |      |         |      |            | <i>F(1, 786) = 0.27</i>      |      |         |       |            |
|                   | Adj. <i>R</i> <sup>2</sup> / $\Delta$ Adj. <i>R</i> <sup>2</sup> | .01/ <.001                  |      |         |       |            | .02/.01                     |      |         |      |            | .02/ <.001                   |      |         |       |            |
|                   | Non-smokers (0) vs. smokers (1)                                  | -0.10                       | 0.05 | -.08    | .035  | .006       | -0.13                       | 0.06 | -.08    | .032 | .002       | 0.21                         | 0.07 | .11     | .003  | .015       |
|                   | Non-nailbiters (0) vs. nailbiters(1)                             | -0.14                       | 0.07 | -.09    | .035  | .007       | 0.07                        | 0.09 | .03     | .452 | .011       | 0.11                         | 0.10 | .05     | .280  | .004       |
|                   | Smoking x nail-biting                                            | 0.03                        | 0.11 | .01     | .767  | <.001      | 0.37                        | 0.14 | .12     | .010 | .008       | 0.09                         | 0.17 | .02     | .601  | <.001      |
| 3                 | <i>F(df)</i>                                                     | <i>F(9,779) = 24.62***</i>  |      |         |       |            | <i>F(9, 776) = 47.76***</i> |      |         |      |            | <i>F(9,780) = 12.73***</i>   |      |         |       |            |
|                   | $\Delta F_1$                                                     | <i>F(6, 779) = 34.63***</i> |      |         |       |            | <i>F(6, 776) = 67.50***</i> |      |         |      |            | <i>F(6, 780) = 16.16***</i>  |      |         |       |            |
|                   | $\Delta F_2$                                                     | <i>F(7, 779) = 29.70***</i> |      |         |       |            | <i>F(7, 776) = 59.29***</i> |      |         |      |            | <i>F(7, 780) = 13.89***</i>  |      |         |       |            |
|                   | Adj. <i>R</i> <sup>2</sup> / $\Delta$ Adj. <i>R</i> <sup>2</sup> | .21/.20                     |      |         |       |            | .35/.33                     |      |         |      |            | .12/.10                      |      |         |       |            |
|                   | Non-smokers (0) vs. smokers (1)                                  | -0.06                       | 0.04 | -.05    | .130  | .002       | -0.11                       | 0.05 | -.07    | .034 | .003       | 0.21                         | 0.07 | .11     | .002  | .015       |
|                   | Non-nail biters (0) vs. nail biters(1)                           | -0.08                       | 0.06 | -.05    | .172  | .002       | -0.05                       | 0.07 | -.03    | .465 | <.001      | 0.08                         | 0.10 | .03     | .414  | .002       |
|                   | Smoking x nail-biting                                            | 0.07                        | 0.10 | .03     | .470  | .001       | 0.23                        | 0.12 | .08     | .049 | .005       | 0.03                         | 0.16 | .01     | .851  | <.001      |
|                   | Openness                                                         | 0.11                        | 0.03 | .14     | <.001 | .021       | -0.10                       | 0.03 | -.10    | .002 | .012       | -0.15                        | 0.04 | -.13    | <.001 | .015       |
| Conscientiousness | 0.19                                                             | 0.02                        | .26  | <.001   | .075  | -0.19      | 0.03                        | -.20 | <.001   | .051 | -0.07      | 0.04                         | -.06 | .069    | .004  |            |
| Extraversion      | 0.01                                                             | 0.02                        | .02  | .657    | <.001 | -0.09      | 0.03                        | -.09 | .003    | .012 | 0.21       | 0.04                         | .20  | <.001   | .036  |            |

| Block                                | Predictor                                                        | Task-oriented ( <i>n</i> = 789) |           |         |          |            | Emotion-oriented ( <i>n</i> = 786) |           |         |          |            | Avoidance-oriented ( <i>n</i> = 790) |           |         |          |            |
|--------------------------------------|------------------------------------------------------------------|---------------------------------|-----------|---------|----------|------------|------------------------------------|-----------|---------|----------|------------|--------------------------------------|-----------|---------|----------|------------|
|                                      |                                                                  | <i>b</i>                        | <i>SE</i> | $\beta$ | <i>p</i> | $\eta_p^2$ | <i>b</i>                           | <i>SE</i> | $\beta$ | <i>p</i> | $\eta_p^2$ | <i>b</i>                             | <i>SE</i> | $\beta$ | <i>p</i> | $\eta_p^2$ |
| 4                                    | Agreeableness                                                    | 0.10                            | 0.03      | .12     | .001     | .013       | 0.03                               | 0.03      | .03     | .345     | .001       | 0.06                                 | 0.05      | .05     | .206     | .002       |
|                                      | Neuroticism                                                      | -0.15                           | 0.02      | -.21    | <.001    | .047       | 0.43                               | 0.03      | .45     | <.001    | .217       | 0.10                                 | 0.04      | .09     | .017     | .007       |
|                                      | Male (0) vs. female (1)                                          | -0.15                           | 0.04      | -.13    | <.001    | .019       | 0.17                               | 0.05      | .12     | <.001    | .018       | 0.34                                 | 0.06      | .19     | <.001    | .034       |
|                                      | <i>F</i> ( <i>df</i> )                                           | <i>F</i> (12,776) = 20.81***    |           |         |          |            | <i>F</i> (12,773) = 36.50***       |           |         |          |            | <i>F</i> (12,777) = 10.12***         |           |         |          |            |
|                                      | $\Delta F_1$                                                     | <i>F</i> (3, 776) = 7.52***     |           |         |          |            | <i>F</i> (3, 773) = 2.09           |           |         |          |            | <i>F</i> (3, 777) = 2.11             |           |         |          |            |
|                                      | $\Delta F_2$                                                     | <i>F</i> (10, 776) = 23.57***   |           |         |          |            | <i>F</i> (10, 773) = 42.31***      |           |         |          |            | <i>F</i> (10, 777) = 10.40***        |           |         |          |            |
|                                      | Adj. <i>R</i> <sup>2</sup> / $\Delta$ Adj. <i>R</i> <sup>2</sup> | .23/.02                         |           |         |          |            | .35/<.01                           |           |         |          |            | .12/<.01                             |           |         |          |            |
|                                      | Non-smokers (0) vs. smokers (1)                                  | -0.08                           | 0.04      | -.07    | .052     | .004       | -0.09                              | 0.05      | -.06    | .068     | .002       | 0.19                                 | 0.07      | .10     | .007     | .013       |
|                                      | Non-nail biters (0) vs. nail biters(1)                           | -0.05                           | 0.06      | -.03    | .444     | <.001      | -0.08                              | 0.07      | -.04    | .292     | <.001      | 0.06                                 | 0.10      | .03     | .546     | .001       |
|                                      | Smoking x nail-biting                                            | 0.09                            | 0.10      | .04     | .334     | .001       | 0.22                               | 0.12      | .07     | .063     | .004       | 0.04                                 | 0.16      | .01     | .795     | <.001      |
|                                      | Openness                                                         | 0.13                            | 0.03      | .17     | <.001    | .028       | -0.11                              | 0.03      | -.11    | <.001    | .015       | -0.14                                | 0.04      | -.12    | .002     | .012       |
|                                      | Conscientiousness                                                | 0.17                            | 0.02      | .23     | <.001    | .056       | -0.17                              | 0.03      | -.18    | <.001    | .042       | -0.07                                | 0.04      | -.06    | .085     | .004       |
|                                      | Extraversion                                                     | 0.03                            | 0.02      | .04     | .193     | .002       | -0.10                              | 0.03      | -.11    | <.001    | .015       | 0.21                                 | 0.04      | .19     | <.001    | .033       |
|                                      | Agreeableness                                                    | 0.11                            | 0.03      | .13     | <.001    | .017       | 0.03                               | 0.03      | .03     | .418     | .001       | 0.06                                 | 0.05      | .05     | .190     | .002       |
| Neuroticism                          | -0.15                                                            | 0.02                            | -.21      | <.001   | .048     | 0.43       | 0.03                               | .45       | <.001   | .218     | 0.10       | 0.04                                 | .09       | .018    | .007     |            |
| Male (0) vs. female (1)              | -0.14                                                            | 0.04                            | -.12      | <.001   | .016     | 0.17       | 0.05                               | .11       | <.001   | .016     | 0.33       | 0.06                                 | .18       | <.001   | .032     |            |
| Age                                  | 0.01                                                             | <0.01                           | .16       | <.001   | .023     | >-0.01     | <0.01                              | -.07      | .041    | .005     | >-0.01     | <0.01                                | -.04      | .265    | .002     |            |
| Below A level (0) vs. A level (1)    | -0.02                                                            | 0.05                            | -.01      | .741    | <.001    | 0.04       | 0.06                               | .03       | .505    | .001     | -0.16      | 0.08                                 | -.09      | .047    | .007     |            |
| Below A level (0) vs. University (1) | -0.01                                                            | 0.05                            | -.01      | .893    | <.001    | 0.02       | 0.07                               | .01       | .791    | .001     | -0.20      | 0.09                                 | -.09      | .029    | .007     |            |

Note. *b* = unstandardized regression coefficient, *SE* = standard error of unstandardized coefficient,  $\beta$  = standardized regression coefficient,  $\eta_p^2$  = partial eta squared,  $\Delta F_1$  = current block vs. preceding block,  $\Delta F_2$  = current block vs. block 1.

All *VIFs* < 1.86.

\**p* < .05. \*\**p* < .01. \*\*\**p* < .001.
